# Supplementary material
Source: PubMed Central journal article supplement (PMC1366634)
Supplement: biophysj_105.061978_1.pdf [file biophysj_105.061978_1.pdf]

## SUPPLEMENTARY MATERIAL

**Figure S1.** Time evolution of the backbone heavy atom RMSD from the initial structure in the: a) Cpep+ simulations, b) Cpep0 simulations, c) Mut+ simulations, d) Mut0 simulations. Black: Simulations in water at 277 K, Red: Simulations in water at 300 K, Green: Simulations in 8M urea.

**Figure S2.**  $C_{\alpha}$  pair-wise RMSD matrix plots. a) Cpep+ simulation in water at 277 K, a') Cpep+ simulation in water at 300 K, a'') Cpep+ simulation 8M urea, b) Cpep0 simulation in water at 300 K, b') Cpep0 simulation 8M urea, c) Mut+ simulation in water at 277 K, c') Mut+ simulation in water at 300 K, c'') Mut+ simulation 8M urea, d) Mut0 simulation in water at 300 K, d') Mut0 simulation 8M urea. The color reflects the  $C_{\alpha}$  RMSD in Ångstroms according to the scale shown.

**Figure S3.** Distributions of the number of hydrogen bonds that the peptide accepts from water with 1.8 Å (open symbols) and 2.4 Å (solid symbols) cutoffs. Black is used for simulations in water at 277 K, red for water at 300 K and green for 8M urea simulations

Figure S1

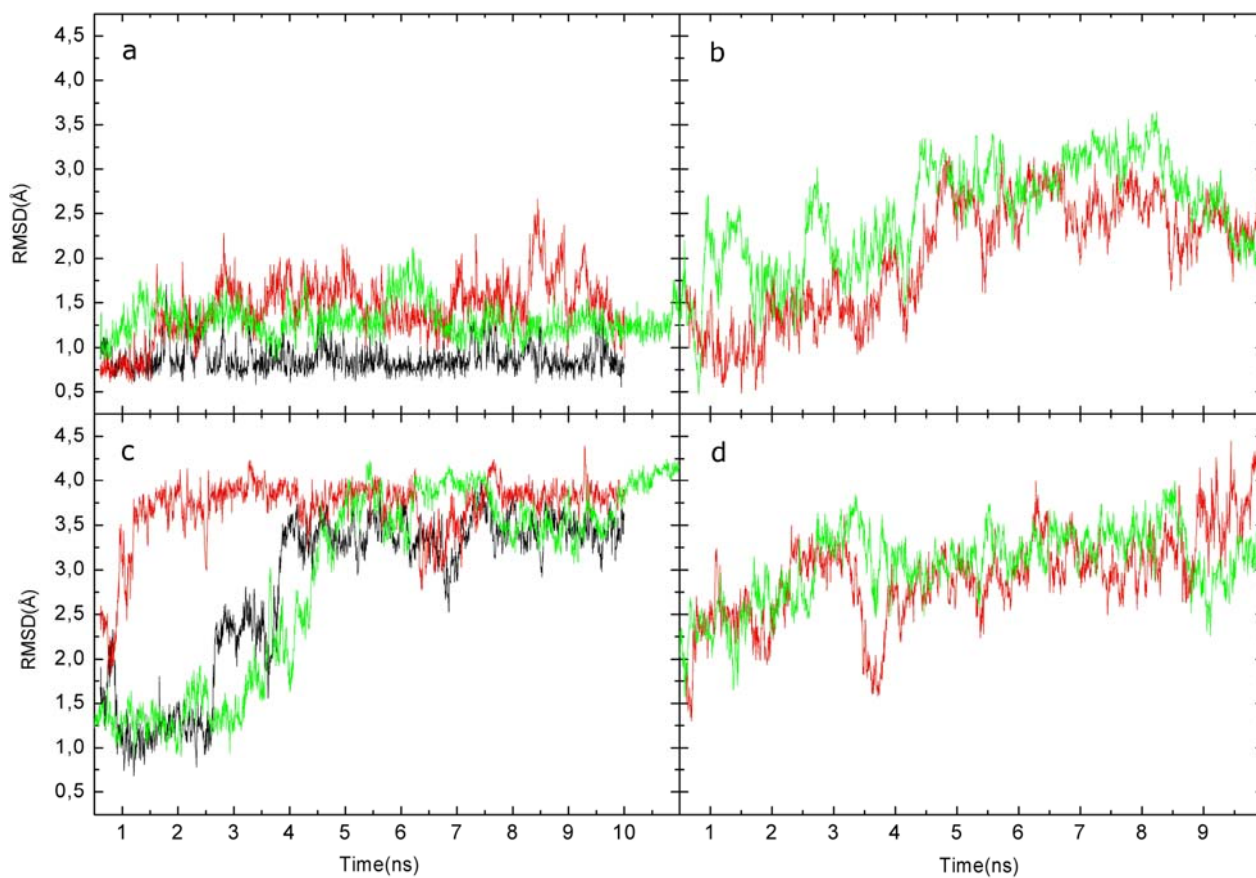

Figure S2

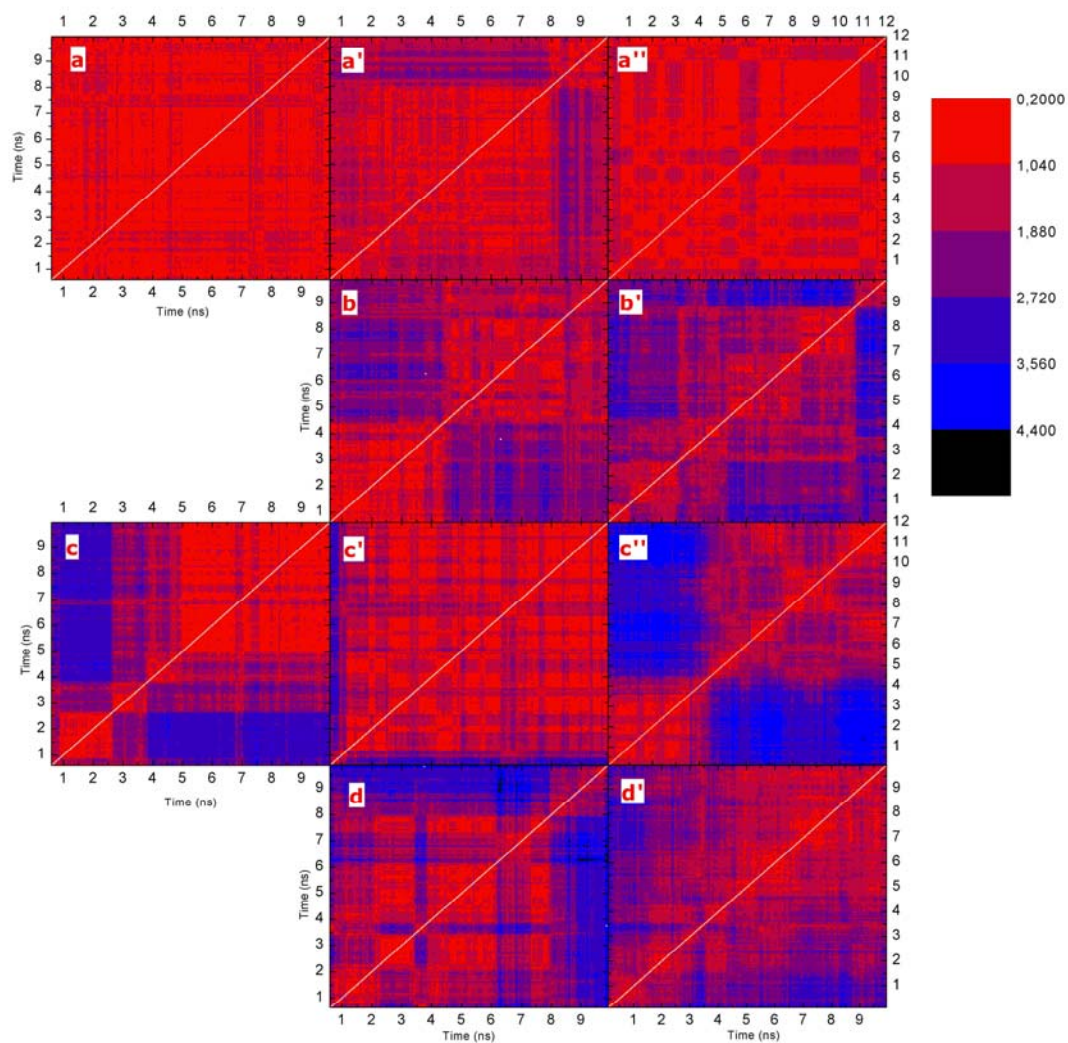

Figure S3

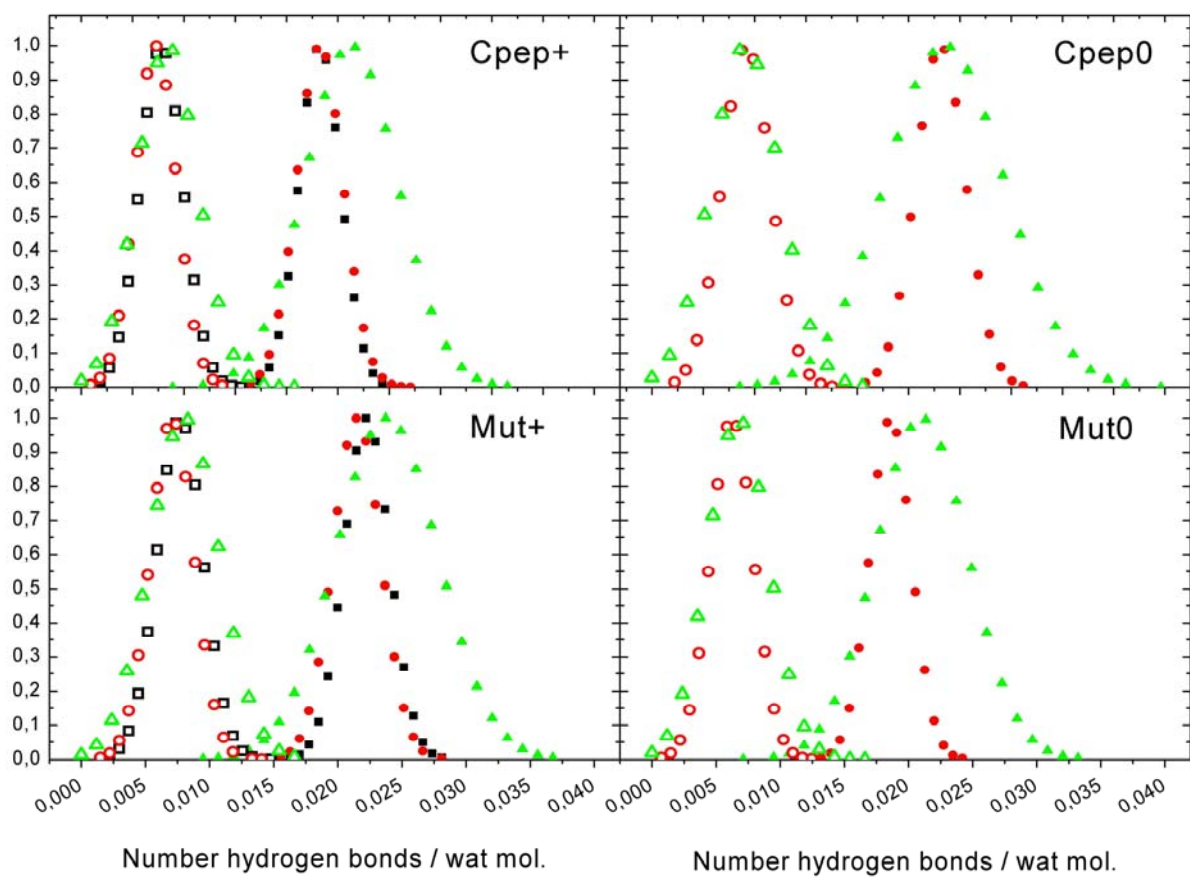

**Table S1** Standard deviations (SD) for the normal distributions of the peptide oxygen-water hydrogen distribution with 2.4 Å and 1.8 cutoff

|             | SD <sub>2.4Å</sub> | SD <sub>1.8Å</sub> |
|-------------|--------------------|--------------------|
| Cpep+ 277 K | 0.0016             | 0.0017             |
| Cpep+ 300 K | 0.0018             | 0.0016             |
| Cpep+ 8M    | 0.0036             | 0.0024             |
| Cpep0 300 K | 0.0020             | 0.0019             |
| Cpep0 8M    | 0.0046             | 0.0027             |
| Mut+ 277 K  | 0.0018             | 0.0018             |
| Mut+ 300 K  | 0.0019             | 0.0017             |
| Mut+ 8M     | 0.0040             | 0.0027             |
| Mut0 300 K  | 0.0021             | 0.0019             |
| Mut0 8M     | 0.0045             | 0.0029             |
